# Supplementary material for: Incomer, a DD36E family of Tc1/mariner transposons newly discovered in animals
Source: PubMed Central journal article supplement (PMC6875036; doi:10.1186/s13100-019-0188-x), 2019-11-23
Supplement: 13100_2019_188_MOESM6_ESM.pdf [file 13100_2019_188_MOESM6_ESM.pdf]

| <b>Species</b>                  | <b>RAG1</b>    |
|---------------------------------|----------------|
| <i>Pygocentrus nattereri</i>    | XM_017700009.1 |
| <i>Sinocyclocheilus grahami</i> | XM_016267534.1 |
| <i>Seriola lalandi dorsalis</i> | XM_023406681.1 |
| <i>Seriola dumerili</i>         | XM_022754679.1 |
| <i>Esox lucius</i>              | XM_010883748.1 |
| <i>Carassius auratus</i>        | EF186007.3     |
| <i>Paramormyrops kingsleyae</i> | XM_023842066.1 |
| <i>Nothobranchius furzeri</i>   | XM_015964816.1 |
| <i>Mastacembelus armatus</i>    | XM_026310413.1 |
| <i>Cyprinodon variegatus</i>    | XM_015389859.1 |
| <i>Takifugu rubripes</i>        | XM_003967412.2 |
| <i>Fundulus heteroclitus</i>    | XM_012853224.2 |
| <i>Cynoglossus semilaevis</i>   | XM_025056486.1 |
| <i>Hippocampus comes</i>        | XM_019893918.1 |
| <i>Austrofundulus limnaeus</i>  | XM_014005535.1 |
| <i>Oryzias melastigma</i>       | XM_024282789.1 |
| <i>Oryzias latipes</i>          | XM_023955935.1 |
| <i>Larimichthys crocea</i>      | XM_010738854.3 |
| <i>Stegastes partitus</i>       | XM_008275863.1 |
| <i>Kryptolebias marmoratus</i>  | XM_017423079.2 |
| <i>Myotis brandtii</i>          | XM_005872642.2 |
| <i>Eptesicus fuscus</i>         | XM_008146798.2 |
| <i>Myotis davidii</i>           | XM_006756100.2 |
| <i>Myotis lucifugus</i>         | XM_023763518.1 |
